# Supplementary material for: Reexamination of the origin of the pseudo Jahn–Teller puckering instability in silicene
Source: Royal Society of Chemistry journal article supplement (doi:10.1039/c4cp05912c), 2015-01-01
Supplement: c4cp05912c1.pdf [file c4cp05912c1.pdf]

Supporting Information File

*Reexamination of the Origin of the Pseudo Jahn-Teller Puckering Instability  
in Silicene*

**Table S1** Standard errors for the fitting coefficients of the 4<sup>th</sup> order polynomial regression applied to the ground and excited states APES

| Method | State             | Standard errors* |                            |                            |
|--------|-------------------|------------------|----------------------------|----------------------------|
|        |                   | $a_0$ (eV)       | $a_2$ (eV/Å <sup>2</sup> ) | $a_4$ (eV/Å <sup>4</sup> ) |
| TPSSH  | Ground            | 0.07             | 0.84                       | 18.1                       |
|        | 1 B <sub>2g</sub> | 0.10             | 1.07                       | 20.4                       |
|        | 2 B <sub>2g</sub> | 0.30             | 3.20                       | 60.9                       |
| B3LYP  | Ground            | 0.02             | 0.22                       | 0.42                       |
|        | 1 B <sub>2g</sub> | 0.22             | 2.37                       | 4.50                       |
|        | 2 B <sub>2g</sub> | 0.53             | 5.59                       | 10.6                       |

\*All values must be multiplied by 10<sup>-2</sup>
